# Supplementary material for: Oblique reactivation of lithosphere-scale lineaments controls rift physiography – the upper-crustal expression of the Sorgenfrei–Tornquist Zone, offshore southern Norway
Source: Copernicus journal article supplement (doi:10.5194/se-9-403-2018), 2018-04-09
Supplement: Supplementary file 1 [file se-9-403-2018-supplement.pdf]

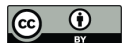

*Supplement of*

**Oblique reactivation of lithosphere-scale lineaments controls rift  
physiography – the upper-crustal expression of the Sorgenfrei–Tornquist  
Zone, offshore southern Norway**

**Thomas B. Phillips et al.**

*Correspondence to:* Thomas B. Phillips (tbphil13@gmail.com)

The copyright of individual parts of the supplement might differ from the CC BY 4.0 License.

## Supplementary Figures

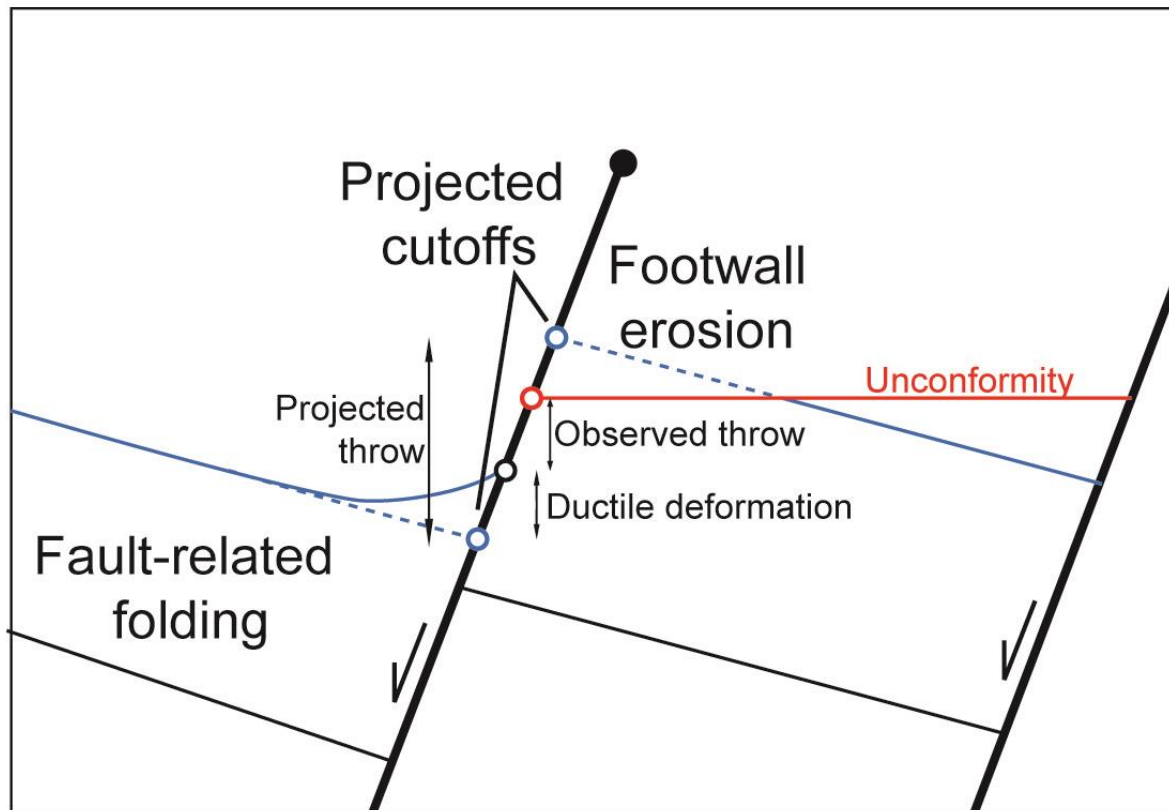

**Figure S1** – Schematic diagram showing the details of fault projections when undertaking quantitative fault analyses

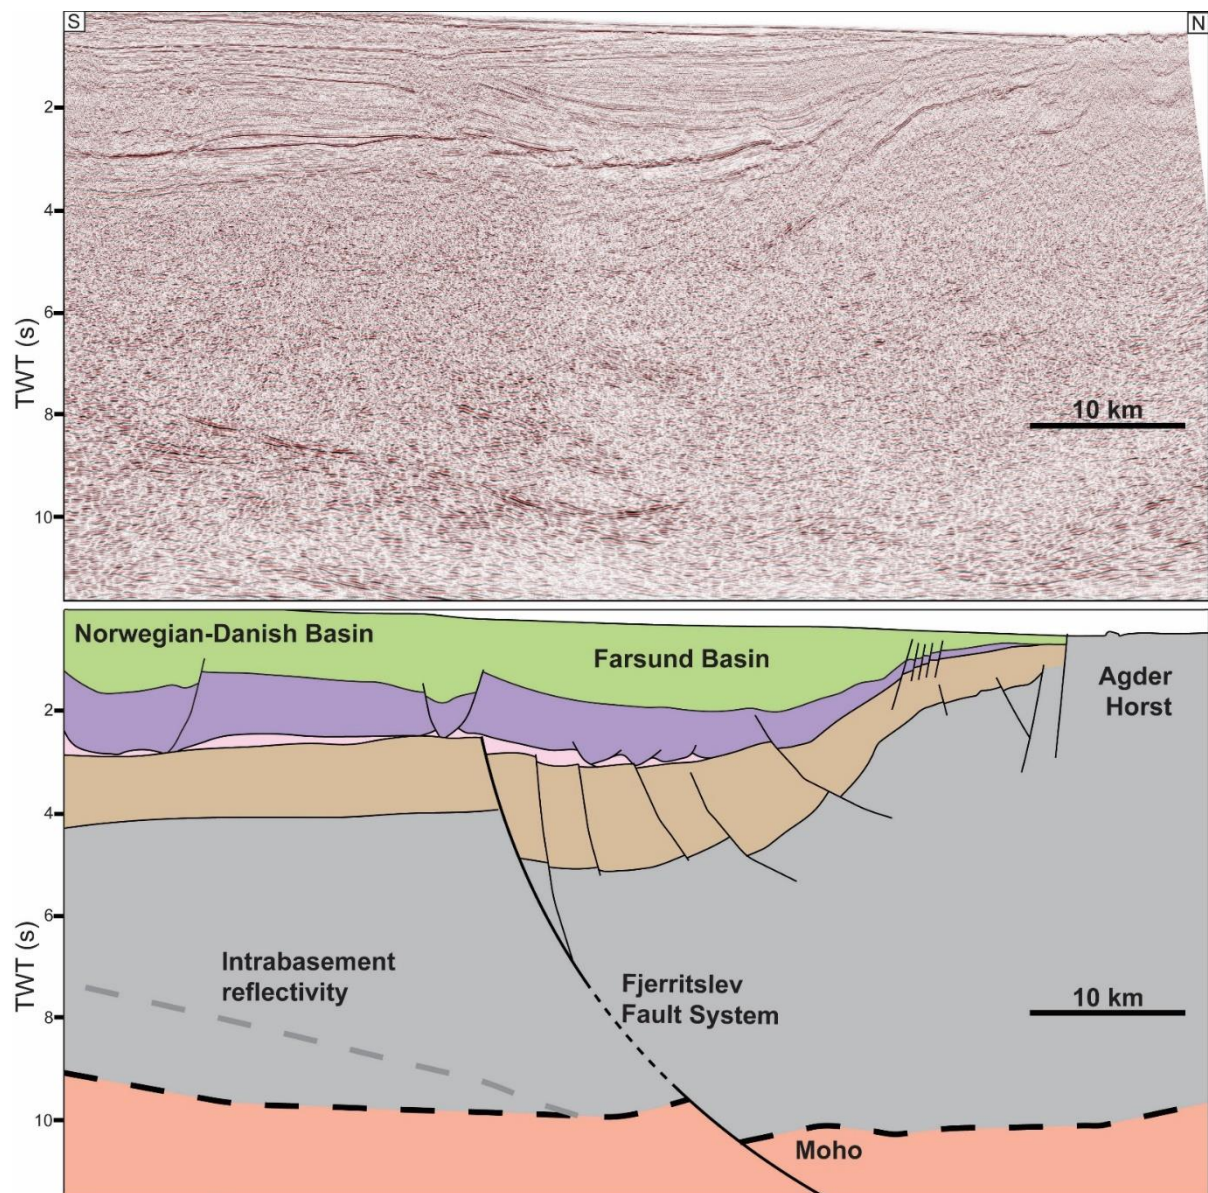

**Figure S2** – Additional seismic section showing potential offset of the Moho by the Fjerritslev Fault System. See Figure 1c for location.



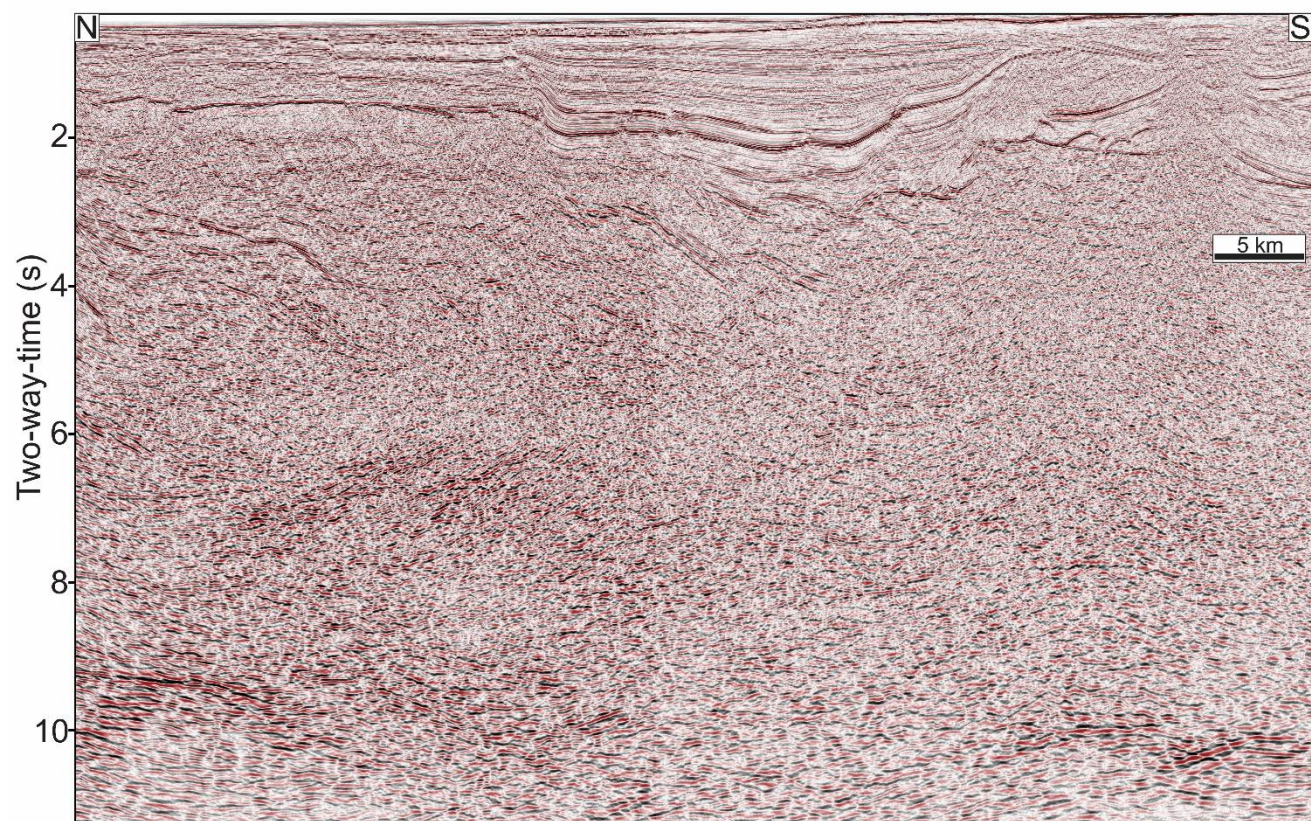

**Figure S3** – Uninterpreted seismic section of Fig. 2.

| Dataset       | Data type | Acquisition year | Record length (ms TWT) | Streamer length (m) | Fold | Shot interval (m) | Polarity (SEG convention) | Processing steps                                       |
|---------------|-----------|------------------|------------------------|---------------------|------|-------------------|---------------------------|--------------------------------------------------------|
|               |           |                  |                        |                     |      |                   |                           |                                                        |
| MC2D FAB 2003 | 2D        | 2003             | 7000                   | 6000                | 120  | 25                | Reverse                   | 2D SRME<br>Hi-res radon demultiple<br>Kirchoff<br>PSTM |
| GFR-93        | 2D        | 1993             | 12000                  | 4500                |      |                   | Reverse                   |                                                        |
| NSR03-07      | 2D        | 2003-2007        | 9216                   | 8087                |      |                   | Reverse                   |                                                        |
| ST9211        | 2D        | 1992             | 7000                   | 3000                |      |                   | Reverse                   |                                                        |
| NH0504        | 3D        | 2005             | 4040                   | 3000                |      |                   | Normal                    |                                                        |

**Table S1** – Table showing the available acquisition and processing parameters for seismic datasets used throughout this study
